# Supplementary material
Source: PubMed Central journal article supplement (PMC2427316)
Supplement: mmc1.pdf [file mmc1.pdf]

## Supplemental Data

### Congenital Joint Dislocations Caused by Carbohydrate

### Sulfotransferase 3 Deficiency in Recessive

### Larsen Syndrome and Humero-Spinal Dysostosis

Pia Hermanns, Sheila Unger, Antonio Rossi, Antonio Perez-Aytes, Hector Cortina, Luisa Bonafé, Loredana Boccone, Valeria Setzu, Michel Dutoit, Luca Sangiorgi, Fabio Pecora, Kerstin Reicherter, Gen Nishimura, Jürgen Spranger, Bernhard Zabel, and Andrea Superti-Furga

## Material and Methods

Genomic DNA was extracted from the subjects' peripheral leucocytes with the Gentra genomic DNA blood isolation kit (Gentra, Minneapolis, MN, USA) according to the manufacturer's protocol. One hundred nanograms of genomic DNA was used as template in the PCR reaction. Exons 2 and 3 of the CHST3 gene are protein coding. A 391 bp product encompassing the whole of exon 2 (247 bp) and containing a 140 bp of coding sequence was generated. Exon 3 of the CHST3 gene consists of 6393 bp, of which 1.3 kb are coding. Given the size of the coding region, exon 3 was amplified in three PCR reactions with overlapping sequences of 86 bp and 93 bp, respectively. Primer information is available upon request. With this approach 66 bp of the noncoding 3'UTR and 85 bp of intron 2 were sequenced. The PCR reaction was carried out with the PCR Master Mix (Promega) in a 25  $\mu$ l reaction at an annealing temperature of 58°C for exon 2 and 60°C for exon 3 (all three parts). In addition, the PCR reactions of exon 3 were supplemented with 5% glycerol. The PCR products were purified with the PCR purification Kit from Promega (Madison, WI, USA) and directly sequenced with Dye Terminator v3.1 on a 3130 Genetic Analyzer (Applied Biosystems) according to the manufacturer's recommendations. DTDST mutations had been excluded in patients 1, 4, and 5, and FLNB mutations had been excluded in patient 2 by routine molecular analysis.<sup>1,2</sup>

For separation of the alleles of patient 5, the PCR products were subcloned into the pGEM T vector (Promega) and transformed into DH5 $\alpha$  cells. Ten single clones were picked and the plasmid DNA was isolated (Eppendorf) and sequenced with the vector-specific primers T7 and SP6, with Dye Terminator kit v3.1 (Applied Biosystems, Forster City, CA, USA).

Skin biopsies were obtained from patients 1 and 2 with informed consent. Skin fibroblasts from patients and controls were cultured in Dulbecco's modified Eagle's medium (DMEM) with 10% fetal calf serum (FCS) and antibiotics at 37°C in a humidified atmosphere containing 5% CO<sub>2</sub>.

Disaccharide analysis of glycosaminoglycan (GAG) chains synthesized in fibroblast cultures was performed as described previously.<sup>3</sup> In brief, confluent cells in 10 cm<sup>2</sup> dishes were washed with PBS to eliminate any sulfotransferase activity that might be present in the FCS and then preincubated for 4 hr in the presence or absence of 1 mM p-nitrophenyl  $\beta$ -D-xylopiranoside (Sigma) in DMEM without FCS in 5% CO<sub>2</sub> at 37°C. Labeling with [6-<sup>3</sup>H]glucosamine (GE Healthcare) was performed in the same medium at a final concentration of 50  $\mu$ Ci/ml. After 24 hr labeling, an equal volume of 100 mM sodium acetate buffer, pH 5.8, containing 8 M urea, 4% Triton X-100, 20 mM EDTA, 20 mM NEM, and 1 mM PMSF was added to the Petri dishes, and samples were loaded on 1 ml DEAE Sephacel columns. After column washing with 50 mM sodium acetate, pH 6.0, 8 M urea, 0.15 M NaCl, 0.5% Triton X-100, and proteinase inhibitors, proteoglycans and hyaluronic acid were eluted with 1 M NaCl in the same buffer, recovered by precipitation with 9 volumes of ethanol and desalted by ultrafiltration with Centricon-10 (Millipore). PGs were then separated from hyaluronic acid by digestion with *Streptomyces* hyaluronidase (Seikagaku Corporation, Tokio, Japan) followed by ultrafiltration with Biomax Ultrafree-0.5 devices with 10kDa cut-off membrane (Millipore). PGs in the retentate were then digested with 30 mU of both chondroitinase ABC and ACII (Seikagaku Corporation) in 30 mM sodium acetate, 30 mM Tris-acetate, pH 7.35, at 37°C overnight. Undigested products were removed by precipitation with 4 volumes of ethanol;<sup>4</sup> the disaccharide constituents of chondroitin sulfate (dimers of glucuronic acid and N-acetyl-D-galactosamine, either unsulfated or sulfated on the positions 4 or 6 of the GalNAc residue;  $\Delta$ Di-0S,  $\Delta$ Di-4S,  $\Delta$ Di-6S) in the supernatants were fractionated with a Supelcosil SAX1 (Supelco, Bellefonte, USA) HPLC column (4.6  $\times$  250 mm) with a gradient of 5–400 mM KH<sub>2</sub>PO<sub>4</sub>, pH 4.2–4.5, at

room temperature, and the elution profile was measured at 232 nm.<sup>5</sup> Standard unlabeled disaccharides ( $\Delta$ Di-0S,  $\Delta$ Di-4S,  $\Delta$ Di-6S) were added as internal reference to radiolabeled samples, and the corresponding peaks at 232 nm were collected and the concentration of radioactive labeled disaccharides determined by liquid scintillation counting.

### Supplemental References

1. Rossi, A. and Superti-Furga, A. (2001). Mutations in the diastrophic dysplasia sulfate transporter (DTDST) gene (SLC26A2): 22 novel mutations, mutation review, associated skeletal phenotypes, and diagnostic relevance. *Hum. Mutat.* *17*(3), 159–171.
2. Krakow, D., Robertson, S.P., King, L.M., Morgan, T., Sebald, E.T., Bertolotto, C., Wachsmann-Hogiu, S., Acuna D, Shapiro SS, Takafuta T, et al. (2004). Mutations in the gene encoding filamin B disrupt vertebral segmentation, joint formation and skeletogenesis. *Nat. Genet.* *36*(4), 405–410.
3. Rossi, A., Kaitila, I., Wilcox, W.R., Rimoin, D.L., Steinmann, B., Cetta, G., and Superti-Furga, A. (1998). Proteoglycan sulfation in cartilage and cell cultures from patients with sulfate transporter chondrodysplasias: relationship to clinical severity and indications on the role of intracellular sulfate production. *Matrix. Biol.* *17*, 361–369.
4. Harper, G.S., Hascall, V.C., Yanagishita, M., and WA Gahl, W.A. (1987). Proteoglycan synthesis in normal and Lowe syndrome fibroblasts. *J. Biol. Chem.* *262*, 5637–5643.
5. Forlino, A., Piazza, R., Tiveron, C., Della Torre, S., Tatangelo, L., Bonafè, L., Gualeni, B., Romano, A., Pecora, F., Superti-Furga, A., et al. (2005). A diastrophic dysplasia sulfate transporter (SLC26A2) mutant mouse: morphological and biochemical characterization of the resulting chondrodysplasia phenotype. *Hum. Mol. Genet.* *14*(6), 859–871.

10 20 30 40 50 60 70 80 90 100

Human MEKGLTLPQDCRDFVHSLKMRSKYALFLVFFVVFVFIIEKENKIIISR  
Rat MEKGLALPQDCRDLVHNLKIRGRVYVFLFAFVVVVFVFIIEKENKIIISR  
Chicken MERRSALPQDFREVLHCLKMRSKYAVLLVFFVVG-LVIIIEKENNFIISR  
Mouse MEKGLALPQDFRDLVHSLKIRGRVYVFLFAFVVVVFVFIIEKENKIIISR  
Bos taurus MEKGLSLPQDCRDFLHSLRMRSKYALFLFAFVVVVFVFIIEKENKIIISR  
Drosophila MSTGIGSSSSSTEEQQHLELSADLEACSLLGPDPSNVDTGRTRAKQRLSLNKGRRSRMSRRANLIGICGVSSLCILLIATTOHRLPTTFNQSAGR  
Canis MEKGLAFPQDCRDFLHSLRMRSKYALFLFAFVVVVFVFIIEKENKIIISR  
Danio  
Felis MEKGLAFPQDCRDLHSLRMRSKYALFLFAFVVVVFVFIIEKENKIIISR  
Oryza -LRMKSKEYALFICVVA-LVIIIEKESIIISR  
Macaca -MAPPFPMEKGLTLLQDCRDFLHSLKMRSKYALFLVFFVVFVFIIEKENKIIISR  
Takifugu -RMRIKYTISVFFVA-LVIIIEKENNIIISR  
Tetraodon -RMRIKYTIFIVFFLA-LVIIIEKENNIIISR  
Sorex MEKGLVLPPERRDLLHGLMRGKYAFFLFAFVVVVFVFIIEKENKIIISR  
Pan MEKGLTLPQDCRDFVHSLKMRSKYALFLVFFVVFVFIIEKENKIIISR  
Otolemur MEKGFSLPQDCRDFMHSRMRGKYALFLFAFVVVVFVFIIEKENKIIISR  
Myotis MEKGLALPQDCRDFLHSLRMRSKYALFLFAFVVVVFVFIIEKENKIIISR  
Monodelphis MEKGFHFWPQDTRDLLHRLRMRSKYALFLFAFVVVVFVFIIEKENKIIISR  
Tupaia MEKGLVLPQDCDFVHNLRMRSKYALFLFAFVVVVFVFIIEKENKIIISR  
Gasterosteus RRRRPSAEQQHSRVMRCKKGMRIKYTIPIVFFVA-LVIIIEKENSIVSR  
Erinaceus MEKGLNLPQDCDFVHSLRMRSKYALFLFAFVVVVFVFIIEKENKIIISR  
Ciona -MRGALLSACDVMNPTDIWASDMRKNR  
Aedes  
Anopheles

110 120 130 140 150 160 170 180 190 200

Human -VSDKLLKQIPQALADAN-STDPALILAEENASLLSLELDSAFSLOLQSLRNLNLSLQGLVEPAMEAAGEEEEEQRKEE-----PPRPAVA  
Rat -VSDKLLKQIPQFVADAN-STDPAALLSEENASLLSLELDSFSLHSLRSLHNLNLSLQGLIAPAMEAQQGEAFAEK-----PSQQA  
Chicken -VSDKLLKQSPQVLEPEAN-ETEASPVQAENGSLASLRQLDTAFSOLRTRLRNVTLQLAGELGIAAP-----PPRPAVA  
Mouse -VSDKLLKQIPHVADAN-STDPAALLSEENASLLSLELDSFSLHSLRSLHNLNLSLQGLVEPAMESQ--EAGAEK-----PSQQA  
Bos taurus -VSDKLLKQIPQSLVDAN-STDPAVLVAENASLLSLELDSAFSLOLQSLRNLNLSLQGLMEPAEAEEEEQTLAEAEWEQLE--PRPPAEA  
Drosophila QGASVDGGPSNSLARSIFYDRFQQQLQQQQSSQTAVNLTATIVDVLVSAQRSRILAEEMENFEYPRGGAERLTDMP-----ETN  
Canis -VSDKLLKQIPQPLVDAN-STDPAALILADNASLLSLELDSAFSLOLQSLRNLNLSLQGLV-----PPRPAVA  
Danio  
Felis -VSDRLKQIPQPLADAN-STDPAALILADNASLLSLELDSAFSLOLQSLRNLNLSLQGLVEPAMEAAGEEAGAKAKE-----PPRPREA  
Oryza -VSDKLSQMHNPHQTPETLQDYSNTTAR-SSFTVLKVLKSLPSTKGNFSNFSEEQPEVDNVGN-----S  
Macaca -VSDKLLKQIPQALADAN-STDPAVLVAENASLLSLELDSAFSLOLQSLRNLNLSLQGLVEPAMEAAGEEEEEQKEE-----PPRPAVA  
Takifugu -VSDKLSLQIPEASLHPSGISTATLLKLNVSSTPFNRANSAPTILIKRRLNYSKHQDVARS-----PPRPAVA  
Tetraodon -MSDKLSLQIPEASLHPSGISTATLLKLNVSSTPFNRANSAPTILIKRRLNYSKHQDVARS-----PPRPAVA  
Sorex -VSGKLMQIPQPAVDAN-STDPAVLVAENASLLSLELSSAFSLOLQSLRNLNLSLQGLGAEAGGAPGEEQAEHGEQE--PGVAGA  
Pan -VSDKLLKQIPQALADAN-STDPAALILAEENASLLSLELDSAFSLOLQSLRNLNLSLQGLVEPAMEAAGEEEEEQRKEE-----PPRPAVA  
Otolemur -VSDKLLKQIPQTLADAN-STDPAVLVAENASLLSLELDSAFSLOLQSLRNLNLSLQGLVEPAMEAAGEE--EKE-----AEASP  
Myotis -VSDKLLKQIPQSLADAN-STDPAVLVAENASLLSLELDSAFSLOLQSLRNLNLSLQGLQPAEAEEEEETKREEEEAEEEEQGEQPPDPAEA  
Monodelphis -VSDKLLKQIPQSLLDAN-STDPAALILAEENASLLSLELDSAFSLOLQSLRNLNLSLQGLVEPAMEAAGEE--EKE-----AEASP  
Tupaia -VSDKLLKQIPQSLADAN-STDPAVLVAENASLLSLELDSAFSLOLQSLRNLNLSLQGLVEPAMEAAGEE--EKE-----AEASP  
Gasterosteus -VSDKLLKQIPQSLADAN-STDPAVLVAENASLLSLELDSAFSLOLQSLRNLNLSLQGLVEPAMEAAGEE--EKE-----AEASP  
Erinaceus -VSGKLSLQIPEASLHPSGISTATLLKLNVSSTPFNRANSAPTILIKRRLNYSKHQDVARS-----PPRPAVA  
Ciona -KSRIGLPLVHKNKRMMTYRVFTVQLVLVVVVVFVGVTVTSNPFKRKRDHAILNMHKTDPSS-----TK  
Aedes  
Anopheles -PPISTAHNSTISIEDVLNYQALISAECTDSSY--GERKLPDGLTP-----ETG

210 220 230 240 250 260 270 280

Human GPRRHVLLMATTRTGSSEFVGEFFNQGG-NIFYLFEPLWHIERIVTSFEPGGANAAGSALVYRDVLKQLFLCDLYLVEHFITPLPEDHLTQFMFRGSSRSL  
Rat GPRRHVLLMATTRTGSSEFVGEFFNQGG-NIFYLFEPLWHIERIVTSFEPGGANAAGSALVYRDVLKQLFLCDLYLVEHFISPPEDHLTQFMFRGSSRSL  
Chicken EPRRHVLLMATTRTGSSEFVGEFFNQGG-NIFYLFEPLWHIERIVTSFEPGGANAVGSALVYRDVLKQLFLCDLYLVEHFISPPEDHLTQFMFRGSSRSL  
Mouse GPRRHVLLMATTRTGSSEFVGEFFNQGG-NIFYLFEPLWHIERIVTSFEPGGANAAGSALVYRDVLKQLFLCDLYLVEHFISPPEDHLTQFMFRGSSRSL  
Bos taurus PPRRHVLLMATTRTGSSEFVGEFFNQGG-NIFYLFEPLWHIERIVTSFEPGGANAAGSALVYRDVLKQLFLCDLYLVEHFISPPEDHLTQFMFRGSSRSL  
Drosophila GTPVRSVVVTSWRSGSTFLGDILNSIP-----GNFYHYEPLLDGFIKQIRDQDELAVQNLKLLNCDYADMIDVNLFG-----IHTHYL  
Canis -VLLMATTRTGSSEFVGEFFNQGG-NIFYLFEPLWHIERIVTSFEPGGANAAGSALVYRDVLKQLFLCDLYLVEHFISPPEDHLTQFMFRGSSRSL  
Danio -RKHILLMATTRTGSSEFVGEFFNQGDNMFYLFEPPLWHIERIVTSFEPGGANAAGSALVYRDVLKQLFLCDLYLVEHFISPPEDHLTQFMFRGSSRSL  
Felis RPRRHVLLMATTRTGSSEFVGEFFNQGG-NIFYLFEPLWHIERIVTSFEPGGANAAGSALVYRDVLKQLFLCDLYLVEHFISPPEDHLTQFMFRGSSRSL  
Oryza LDHKHILLMATTRTGSSEFVGEFFNQGG-NIFYLFEPLWHIERIVTSFEPGGANAAGSALVYRDVLKQLFLCDLYLVEHFISPPEDHLTQFMFRGSSRSL  
Macaca GPRRHVLLMATTRTGSSEFVGEFFNQGG-NIFYLFEPLWHIERIVTSFEPGGANAAGSALVYRDVLKQLFLCDLYLVEHFISPPEDHLTQFMFRGSSRSL  
Takifugu -RRKHILLMATTRTGSSEFVGEFFNQGG-NMIFYLFEPPLWHIERIVTSFEPGGANAAGSALVYRDVLKQLFLCDLYLVEHFISPPEDHLTQFMFRGSSRSL  
Tetraodon -GRKHILLMATTRTGSSEFVGEFFNQGDNMFYLFEPPLWHIERIVTSFEPGGANAAGSALVYRDVLKQLFLCDLYLVEHFISPPEDHLTQFMFRGSSRSL  
Sorex GPRRHVLLMATTRTGSSEFVGEFFNQGG-NIFYLFEPLWHIERIVTSFEPGGANAAGSALVYRDVLKQLFLCDLYLVEHFISPPEDHLTQFMFRGSSRSL  
Pan GPRRHVLLMATTRTGSSEFVGEFFNQGG-NIFYLFEPLWHIERIVTSFEPGGANAAGSALVYRDVLKQLFLCDLYLVEHFISPPEDHLTQFMFRGSSRSL  
Otolemur APRRHVLLMATTRTGSSEFVGEFFNQGG-NIFYLFEPLWHIERIVTSFEPGGANAAGSALVYRDVLKQLFLCDLYLVEHFISPPEDHLTQFMFRGSSRSL  
Myotis RRRRHVLLMATTRTGSSEFVGEFFNQGG-NIFYLFEPLWHIERIVTSFEPGGANAAGSALVYRDVLKQLFLCDLYLVEHFISPPEDHLTQFMFRGSSRSL  
Monodelphis GPRRHVLLMATTRTGSSEFVGEFFNQGG-NIFYLFEPLWHIERIVTSFEPGGANAAGSALVYRDVLKQLFLCDLYLVEHFISPPEDHLTQFMFRGSSRSL  
Tupaia GPRRHVLLMATTRTGSSEFVGEFFNQGG-NIFYLFEPLWHIERIVTSFEPGGANAAGSALVYRDVLKQLFLCDLYLVEHFISPPEDHLTQFMFRGSSRSL  
Gasterosteus -GRRHILLMATTRTGSSEFVGEFFNQGDNMFYLFEPPLWHIERIVTSFEPGGANAAGSALVYRDVLKQLFLCDLYLVEHFISPPEDHLTQFMFRGSSRSL  
Erinaceus GPRRHVLLMATTRTGSSEFVGEFFNQGG-NIFYLFEPLWHIERIVTSFEPGGANAAGSALVYRDVLKQLFLCDLYLVEHFISPPEDHLTQFMFRGSSRSL  
Ciona AKYKGVIVTNRHSGSTFTGELFNQHE-DVFIYFIEPLIQAR-----SGCGDEEDKMKILMRMLQCDLGSPEGERITQDAGVQRQRCISNFCFRE  
Aedes  
Anopheles GKPTRSLIITTWRSSTFLGDILNALP-----GNYYHYEPLLDIVQIRGPPNDSVALHNLRLHLLHCDYSEMENYLEFG-----R-THNYL

L259P

L307P

310 320 340 350 360 370 390 400

Human CEDPVC...
Rat CEDPVC...
Chicken CEEPVCT...
Mouse CEDPVC...
Bos taurus CEDPVC...
Drosophila FEHNTRL...
Canis CEEPVCT...
Danio CEEQVCS...
Felis CEDPVC...
Oryza CEEPVCT...
Macaca CEDPVC...
Takifugu CEESVCS...
Tetraodon CEDSVCS...
Sorex CEEPVCT...
Pan CEDPVC...
Otolemur CEDPVC...
Myotis CEDPVC...
Monodelphis CEEPVCT...
Tupaia CEDPVC...
Gasterosteus CEASVCS...
Erinaceus CEDPVC...
Ciona KSKVLC...
Aedes -----
Anopheles FSHNTRL...

410 420 R357Q E372K 50 460 470 480 490 500

Human GODDGL...
Rat GODDLS...
Chicken GEAPLQ...
Mouse GODDLS...
Bos taurus GODDLS...
Drosophila -----
Canis GQARLG...
Danio GEVPIE...
Felis GQARLG...
Oryza GQVPED...
Macaca GODDGL...
Takifugu GVTPLD...
Tetraodon GDVPLD...
Sorex GODDRL...
Pan GODDGL...
Otolemur GEDRLEE...
Myotis GODDRL...
Monodelphis GEASLRE...
Tupaia GODDRL...
Gasterosteus GDVPID...
Erinaceus GODDRL...
Ciona -----
Aedes -----
Anopheles -----

510 520 530 540 550 560 570 580 590 600

Human AHDGSG...
Rat ARDSSD...
Chicken PDSNGI...
Mouse TRDSSD...
Bos taurus AHDG--...
Drosophila KVINIG...
Canis AQDASG...
Danio ASEANG...
Felis AQDGGI...
Oryza VQEASG...
Macaca AHDGSG...
Takifugu SKKASG...
Tetraodon SKKTSG...
Sorex AQAGTG...
Pan AHDGSG...
Otolemur -----
Myotis PRDGGI...
Monodelphis SRDGGI...
Tupaia VRDGGI...
Gasterosteus SKGTSV...
Erinaceus AQDSSG...
Ciona RPKTKL...
Aedes KLDIGG...
Anopheles KQDVG...

```
.....|.....|.
Human      ERGTFWVT---
Rat        ERGTFWVT---
Chicken    EGPPTRIT---
Mouse      ERGTFWVT---
Bos taurus ERGTFWVT---
Drosophila MPPFFT-----
Canis      ERGTFWVT---
Danio      EK-----
Felis      -----
Oryza      EKQF-----
Macaca     ERGTFWVT---
Takifugu   DK-----
Tetraodon -----
Sorex      ERGTFWVT---
Pan        ERGTFWVT---
Otolemur   -----
Myotis     ERGTFWVT---
Monodelphis DRGTFWVT---
Tupaia     ERGTFWVT---
Gasterosteus D-----
Erinaceus  EGGTFWVT---
Ciona      PLCNDVTIGDC
Aedes      PLLPYSVS---
Anopheles  PLLPYSVS---
```
